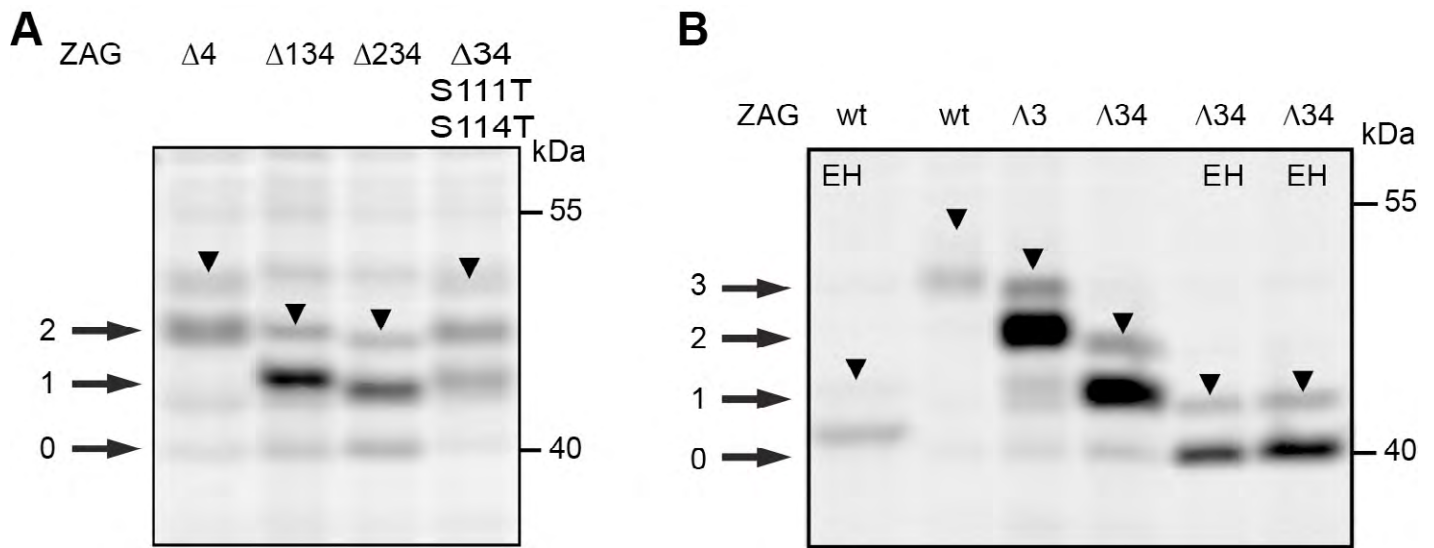

**Fig. S1. Characterization of the low mobility ZAG product.** HeLa cells expressing wild type ZAG (B) and various ZAG glycosylation site mutants (A, B) were pulse labeled for 10 min. ZAG glycoforms (0-3 glycans) were immunoprecipitated using anti-DDK antibody and resolved by SDS-PAGE. EH designates digestion with endoglycosidase H. Arrowheads designate the low mobility ZAG product detected in all pulse-labeling experiments. (A) The relative intensity of the low mobility ZAG product was greater when cells were pulse labeled than after a 4 min pulse followed by a 20 min chase (Fig. 3). (B) Endoglycosidase H digestion of the ZAG-wt and ZAG $\Delta$ 34 each yielded two products rather than one, indicating that the slow mobility product did not contain an additional N-linked glycan.
